# Supplementary material for: South-American plate advance and forced Andean trench retreat as drivers for transient flat subduction episodes
Source: PubMed Central journal article supplement (PMC5440808; doi:10.1038/ncomms15249), 2017-05-16
Supplement: ncomms15249-s1.pdf [file ncomms15249-s1.pdf]

**Supplementary Table 1.**  
**Shortening estimates used in**  
**the reconstruction of the**  
**Andes. See Figure 1 for section**  
**locations.**

| Structure/Region | Transect | Type of data | Sense       | Amount     | Plate ID        | Age             | Reference  |    |
|------------------|----------|--------------|-------------|------------|-----------------|-----------------|------------|----|
| Subandes         | 1        | Shortening   | e-w         | 11 km      | 2551            | 15-0 Ma         | 1          |    |
|                  | 2        | Shortening   | e-w         | 20 km      | 2551            | 15-0 Ma         | 2, 3       |    |
|                  | 3        | Shortening   | ne-sw       | 84 km      | 2553            | 24-0 Ma         | 4, 5       |    |
|                  | 4        | Shortening   | ne-sw       | 95 km      | 2553            | 24-0 Ma         | 5          |    |
|                  | 5        | Shortening   | ne-sw       | 24,7 km    | 2552            | 24-0 Ma         | 5, 6       |    |
|                  | 6        | Shortening   | ne-sw       | 40 km      | 2546            | 24-0 Ma         | 3, 5, 7    |    |
|                  | 7        | Shortening   | ne-sw       | 42,3 km    | 2546            | 24-0 Ma         | 5, 6       |    |
|                  | 8        | Shortening   | ne-sw       | 56 km      | 2593            | 15-0 Ma         | 4, 8       |    |
|                  | 9        | Shortening   | ne-sw       | 17 km      | 2544            | 15-0 Ma         | 9          |    |
|                  | 10       | Shortening   | ne-sw       | 40 km      | 2544            | 15-0 Ma         | 1, 9       |    |
|                  | 11       | Shortening   | ne-sw       | 20 km      | 2544            | 15-0 Ma         | 3, 9, 10   |    |
|                  | 12       | Shortening   | ne-sw       | 105 km     | 2539            | 15-0 Ma         | 11, 12, 13 |    |
|                  | 13       | Shortening   | ne-sw       | 135 km     | 2539            | 15-0 Ma         | 13, 14     |    |
|                  | 14       | Shortening   | ne-sw       | 66 km      | 2536            | 15-0 Ma         | 13         |    |
|                  | 15       | Shortening   | ne-sw       | 74 km      | 2536            | 15-0 Ma         | 13, 15     |    |
|                  | 16       | Shortening   | ne-sw       | 72 km      | 2533            | 10-0 Ma         | 16, 17     |    |
|                  | 18       | Shortening   | ene-<br>wsw | 86 km      | 2530            | 15-0 Ma         | 18         |    |
|                  | 19       | Shortening   | e-w         | 67 km      | 2523            | 15-0 Ma         | 16, 19     |    |
|                  | 21       | Shortening   | e-w         | 60-78 km   | 2519            | 15-0 Ma         | 20, 21     |    |
|                  | 22       | Shortening   | e-w         | 60 km      | 2519            | 9-0 Ma          | 22         |    |
|                  |          |              | Rotation    | ccw        | 13 degrees      | 2530, 36,<br>39 | 15-0 Ma    | 23 |
|                  |          |              | Rotation    | ccw        | 13 degrees      | 2533            | 10-0 Ma    | 23 |
|                  |          | Rotation     | cw          | 13 degrees | 2519, 23,<br>28 | 15-0 Ma         | 23         |    |

|                             |    |            |            |          |           |           |            |
|-----------------------------|----|------------|------------|----------|-----------|-----------|------------|
| <b>Eastern Cordillera</b>   | 4  | Shortening | ne-sw      | 47 km    | 2549      | 30-23 Ma  | 5          |
|                             | 5  | Shortening | ne-sw      | 26 km    | 2547      | 30-20 Ma  | 5, 6       |
|                             | 7  | Shortening | ne-sw      | 46 km    | 2554      | 30-20 Ma  | 5, 6       |
|                             | 9  | Shortening | ne-sw      | 91 km    | 2596      | 45-20 Ma  | 9          |
|                             | 10 | Shortening | ne-sw      | 81 km    | 2596      | 45-20 Ma  | 1, 9       |
|                             | 14 | Shortening | ne-sw      | 123 km   | 2538      | 50-25 Ma  | 13, 24     |
|                             | 16 | Shortening | ne-sw      | 142 km   | 2535      | 50-25 Ma  | 16, 17     |
|                             | 17 | Shortening | ene-<br>sw | 136 km   | 2532      | 50-25 Ma  | 18         |
|                             | 19 | Shortening | e-w        | 122 km   | 2525      | 40-20 Ma  | 16, 19     |
|                             | 21 | Shortening | e-w        | 95 km    | 2522      | 40-20 Ma  | 25, 26, 27 |
|                             | 27 | Shortening | e-w        | 70 km    | 2594      | 40-20 Ma  | 28, 29, 30 |
| <b>Interandes</b>           | 14 | Shortening | ne-sw      | 48 km    | 2537      | 45-25 Ma  | 13, 24     |
|                             | 16 | Shortening | ne-sw      | 39 km    | 2534      | 20-10 Ma  | 16, 17     |
|                             | 18 | Shortening | ene-<br>sw | 43 km    | 2529.2531 | 45-15 Ma  | 18         |
|                             | 19 | Shortening | e-w        | 96 km    | 2524      | 25-15 Ma  | 16, 19     |
|                             | 21 | Shortening | e-w        | 62 km    | 2520      | 20-10 Ma  | 25, 26, 27 |
| <b>Altiplano</b>            | 9  | Shortening | ne-sw      | 15 km    | 2597      | 15-0 Ma   | 9          |
|                             | 14 | Shortening | ne-sw      | 40 km    | 2542      | 15-0 Ma   | 13         |
|                             | 16 | Shortening | ne-sw      | 47 km    | 2587.2598 | 15-0 Ma   | 16         |
|                             | 19 | Shortening | ne-sw      | 41 km    | 2526      | 15-0 Ma   | 16         |
|                             | 20 | Shortening | e-w        | 24 km    | 2526      | 33-27 Ma  | 31         |
|                             | 20 | Shortening | e-w        | 41 km    | 2526      | 15-0 Ma   | 31         |
| <b>Precordillera</b>        | 29 | Shortening | e-w        | 95 km    | 2505      | 13-0 Ma   | 32, 33     |
|                             | 31 | Shortening | e-w        | 88 km    | 2505      | 13-0 Ma   | 33, 34     |
| <b>Principal Cordillera</b> | 29 | Shortening | e-w        | <30 km   | 2513      | 20-8,6 Ma | 32, 35     |
|                             | 32 | Shortening | e-w        | 55-60 km | 2511      | 20-8,6 Ma | 35, 36     |
|                             | 33 | Shortening | e-w        | 55-60 km | 2512      | 20-8,6 Ma | 35, 36     |
|                             | 38 | Shortening | e-w        | 73 km    | 2507      | 20-8,6 Ma | 35, 36     |

|                              |       |            |       |             |      |             |            |
|------------------------------|-------|------------|-------|-------------|------|-------------|------------|
|                              | 39    | Shortening | e-w   | 29,5 km     | 2591 | 11,6-0 Ma   | 37         |
|                              | 39    | Extension  | e-w   | 3 km        | 2591 | 33,9-16 Ma  | 37         |
|                              | 40.41 | Shortening | e-w   | 5,9-12,5 km | 2589 | 100,5-56 Ma | 37         |
|                              | 40.41 | Extension  | e-w   | 0,8-1 km    | 2589 | 56-11,6 Ma  | 37         |
|                              | 40.41 | Shortening | e-w   | 5,3-13,2 km | 2589 | 11,6-0 Ma   | 37         |
|                              | 42    | Shortening | e-w   | 24 km       | 2502 | 11,6-0 Ma   | 37, 38     |
| <b>Frontal Cordillera</b>    | 30    | Shortening | e-w   | 8 km        | 2518 | 8,5-4 Ma    | 39, 40     |
|                              | 32.33 | Shortening | e-w   | 18 km       | 2510 | 8,5-4 Ma    | 39, 40     |
|                              | 34.35 | Shortening | e-w   | 15-23 km    | 2509 | 8,5-4 Ma    | 40, 41     |
|                              | 36.37 | Shortening | e-w   | 8 km        | 2506 | 7,7-4 Ma    | 41         |
| <b>Santa Barbara System</b>  | 23    | Shortening | e-w   | 30 km       | 2517 | 26,7 Ma     | 27, 42     |
|                              | 24    | Shortening | e-w   | 21 km       | 2517 | 26,7 Ma     | 27, 28     |
|                              | 25    | Shortening | e-w   | 21 km       | 2517 | 26,7 Ma     | 27, 42     |
| <b>Puna</b>                  | 26    | Shortening | e-w   | 37 km       | 2522 | 37,8-0 Ma   | 43         |
| <b>Patagonian Cordillera</b> | 43    | Shortening | e-w   | 35 km       | 2586 | 11,6-5,3 Ma | 44         |
|                              | 44    | Shortening | e-w   | 29 km       | 2585 | 11,6-5,3 Ma | 45         |
|                              | 45    | Shortening | ne-sw | 27 km       | 2584 | 88-74 Ma    | 46         |
|                              | 45    | Shortening | ne-sw | 6.1 km      | 2584 | 74-27 Ma    | 46         |
|                              | 45    | Shortening | ne-sw | 3.4 km      | 2584 | 27-21 Ma    | 46         |
|                              | 45    | Shortening | ne-sw | 2.2 km      | 2584 | 21-18 Ma    | 46         |
|                              | 45    | Shortening | ne-sw | 0.9 km      | 2584 | 18-0 Ma     | 46         |
|                              | 46    | Shortening | ne-sw | ~23 km      | 2583 | 84-33,9 Ma  | 47         |
|                              | 47    | Shortening | ne-sw | ~23 km      | 2584 | 84-33,9 Ma  | 47         |
|                              | 48    | Shortening | ne-sw | ~23 km      | 2585 | 84-33,9 Ma  | 47         |
|                              | 49    | Shortening | ne-sw | 50-83 km    | 2580 | 66-0 Ma     | 48         |
|                              | 50    | Shortening | n-s   | 50-83 km    | 2581 | 66-0 Ma     | 38         |
| <b>Sierras Pampeanas</b>     | 28    | Shortening | e-w   | 20 km       | 2504 | 10-0 Ma     | 49, 50, 51 |

|                                            |               |                    |              |          |            |         |        |
|--------------------------------------------|---------------|--------------------|--------------|----------|------------|---------|--------|
|                                            | 29            | Shortening         | e-w          | 10-20 km | 2504       | 10-0 Ma | 36, 51 |
| <b>Magallanes-Fagnano Fault system</b>     |               | Strike slip        | left lateral | 50 km    |            | 8-0 Ma  | 52     |
| <b>Western Cordillera and coastal belt</b> | 5             | Shortening         | ne-sw        | 52,5 km  | 2555       | 50-0 Ma | 6      |
|                                            | 7             | Shortening         | ne-sw        | 80 km    | 2548       | 50-0 Ma | 6      |
| <b>Subduction erosion</b>                  | Between 22-27 | Subduction erosion |              | ~31 km   | 2527, 2516 | 20-0 Ma | 53, 54 |
|                                            | Between 22-28 | Subduction erosion |              | ~31 km   | 2527, 2516 | 20-0 Ma | 55     |
|                                            | 29            | Subduction erosion |              | ~40 km   | 2514       | 15-0 Ma | 56     |
|                                            | 33            | Subduction erosion |              | ~40 km   | 2512       | 10-0 Ma | 53     |
|                                            | 41            | Subduction erosion |              | ~10 km   | 2503       | 11-3 Ma | 53     |

### Supplementary references

1. Gil Rodriguez, W., Baby, P. & Ballard, J.-F. Structure et contrôle paléogéographique de la zone subandine péruvienne. *Comptes Rendus de l'Académie des Sciences de Paris* **333**, 741–748 (2001).
2. Aleman, A. M. & Marksteiner, R. Structural styles in the Santiago fold and thrust belt, Peru: A salt related orogenic belt. *Second ISAG* 147–153 (1993). doi:10.1130/0091-7613(1998)026<0723:TSACTI>2.3.CO;2
3. Kley, J. & Monaldi, C. R. Tectonic shortening and crustal thickness in the Central Andes: How good is the correlation? *Geology* **26**, 723–726 (1998).
4. Hermoza, W. *et al.* The Huallaga foreland basin evolution: Thrust propagation in a deltaic environment, northern Peruvian Andes. *J. South Am. Earth Sci.* **19**, 21–34 (2005).
5. Eude, A. La croissance des Andes centrales du nord du Pérou (5-9°S): Propagation d'un prisme orogénique dans un contexte d'héritage tectonique et de subduction plane. (Université Toulouse III Paul Sabatier, 2014).
6. Pfiffner, O. & Gonzalez, L. Mesozoic–Cenozoic Evolution of the Western Margin of South America: Case Study of the Peruvian Andes. *Geosciences* **3**, 262–310 (2013).
7. Koch, E. *Die Tektonik im Subandin des Mittel-Ucayali-Gebietes, Ostperu.* (1962). doi:10.3390/geosciences3020262
8. Espurt, N. *et al.* Paleozoic structural controls on shortening transfer in the Subandean foreland thrust system, Ene and southern Ucayali basins, Peru. *Tectonics* **27**, n/a–n/a (2008).

9. Gotberg, N., McQuarrie, N. & Caillaux, V. C. Tectonics and uplift in Central Andes (Peru, Bolivia and northern Chile) from Eocene to present. *Geological Society of America Bulletin* **122**, 727–742 (2009).
10. Sébrier, M., Lavenu, A., Fornari, M. & Soulas, J. P. Tectonics and uplift in Central Andes (Peru, Bolivia and northern Chile) from Eocene to present. *Géodynamique* (1988).
11. Roeder, D. Andean-age structure of Eastern Cordillera (Province of La Paz, Bolivia). *Tectonics* **7**, 23–39 (1988).
12. Roeder, D. & Chamberlain, R. L. Structural geology of sub-Andean fold and thrust belt in northwestern Bolivia. *AAPG Special Volumes* **62**, 459–479 (1995).
13. McQuarrie, N., Barnes, J. B. & Ehlers, T. A. Geometric, kinematic and erosional history of central Andean Plateau (15–17°S), northern Bolivia. *Tectonics* **27**, TC3007–doi:10.1029–2006TC002054 (2008).
14. Baby, P., Hérail, G., Lopez, J. M. & López, O. Structure de la zone subandine de Bolivie: influence de la géométrie des séries sédimentaires antéorogéniques sur la propagation des chevauchements. *Comptes Rendus Academie Science Paris* (1989).
15. Baby, P., Rochat, P., Mascle, G. & Hérail, G. Neogene shortening contribution to crustal thickening in the back arc of the Central Andes. *Geology* **25**, 883–886 (1997).
16. McQuarrie, N. The kinematic history of the central Andean fold-thrust belt, Bolivia: implications for building a high plateau. *Geological Society of America Bulletin* **114**, 950–963 (2002).
17. Eichelberger, N. *et al.* New constraints on the chronology, magnitude, and distribution of deformation within the central Andean orocline. *Tectonics* **32**, 1432–1453 (2013).
18. Barnes, J. B., Ehlers, T. A., McQuarrie, N., O'Sullivan, P. B. & Tawackoli, S. Thermochronometer record of central Andean Plateau growth, Bolivia (19.5°S). *Tectonics* **27**, TC3003–doi:10.1029–2007TC002174 (2008).
19. Dunn, J. F., Hartshorn, K. G. & Hartshorn, P. W. Structural styles and hydrocarbon potential of the sub-Andean thrust belt of southern Bolivia. *AAPG Special Volumes* **62**, 523–543 (1995).
20. Uba, C. E., Kley, J., Strecker, M. R. & Schmitt, A. K. Unsteady evolution of the Bolivian Subandean thrust belt: The role of enhanced erosion and clastic wedge progradation. *Earth and Planetary Science Letters* **281**, 134–146 (2009).
21. Echavarría, L., Hernández, R., Allmendinger, R. & Reynolds, J. Subandean thrust and fold belt of northwestern Argentina: Geometry and timing of the Andean evolution. *AAPG Bulletin* **87**, 965–985 (2003).
22. Arriagada, C., Roperch, P., Mpodozis, C. & Cobbold, P. R. Paleogene building of the Bolivian Orocline: Tectonic restoration of the central Andes in 2-D map view. *Tectonics* **27**, n/a–n/a (2008).
23. Barnes, J. B., Ehlers, T. A., McQuarrie, N., O'Sullivan, P. B. & Pelletier, J. D. Eocene to recent variations in erosion across the central Andean fold-thrust belt, northern Bolivia: Implications for plateau evolution. *Earth and Planetary Science Letters* **248**, 118–133 (2006).
24. Barnes, J. B., Ehlers, T. A., Insel, N., McQuarrie, N. & Poulsen, C. J. Linking orography, climate, and exhumation across the central Andes. *Geology* **40**, 1135–1138 (2012).
25. Kley, J. Transition from basement-involved to thin-skinned thrusting in the Cordillera Oriental of southern Bolivia. *Tectonics* **15**, 763–775 (1996).
26. Müller, J. P., Kley, J. & Jacobshagen, V. Structure and Cenozoic kinematics of the Eastern Cordillera, southern Bolivia (21°S). *Tectonics* **21**, 1–1–1–24 (2002).

27. Ege, H., Sobel, E. R., Scheuber, E. & Jacobshagen, V. Exhumation history of the southern Altiplano plateau (southern Bolivia) constrained by apatite fission track thermochronology. *Tectonics* **26**, n/a–n/a (2007).
28. Pearson, D. M. *et al.* Influence of pre-Andean crustal structure on Cenozoic thrust belt kinematics and shortening magnitude: Northwestern Argentina. *Geosphere* **9**, 1766–1782 (2013).
29. Grier, M. E., Salfity, J. A. & Allmendinger, R. W. Andean reactivation of the Cretaceous Salta rift, northwestern Argentina. *Journal of South American Earth ...* **4**, 351–372 (1991).
30. Cristallini, E., Cominguez, A. H. & Ramos, V. A. Deep structure of the Metan-Guachipas region: tectonic inversion in Northwestern Argentina. *J. South Am. Earth Sci.* **10**, 403–421 (1997).
31. Elger, K., Oncken, O. & Glodny, J. Plateau-style accumulation of deformation: Southern Altiplano. *Tectonics* **24**, n/a–n/a (2005).
32. Allmendinger, R. W. *et al.* Foreland shortening and crustal balancing in the Andes at 30°S latitude. *Tectonics* **9**, 789–809 (1990).
33. Allmendinger, R. W. & Judge, P. A. The Argentine Precordillera: A foreland thrust belt proximal to the subducted plate. *Geosphere* **10**, 1203–1218 (2014).
34. Gosen, Von, W. Structural evolution of the Argentine precordillera: the Rio San Juan section. *Journal of Structural Geology* **14**, 643–667 (1992).
35. Ramos, V. A., Cristallini, E. O. & Pérez, D. J. The Pampean flat-slab of the Central Andes. *J. South Am. Earth Sci.* **15**, 59–78 (2002).
36. Ramos, V. A., Cegarra, M. & Cristallini, E. Cenozoic tectonics of the High Andes of west-central Argentina (30–36°S latitude). *Tectonophysics* **259**, 185–200 (1996).
37. Rojas Vera, E. A., Folguera, A., Zamora Valcarce, G., Bottesi, G. & Ramos, V. A. Structure and development of the Andean system between 36° and 39°S. *Journal of Geodynamics* **73**, 34–52 (2014).
38. Kley, J., Monaldi, C. R. & Salfity, J. A. Along-strike segmentation of the Andean foreland: causes and consequences. *Tectonophysics* **301**, 75–94 (1999).
39. Heredia, N., Rodríguez Fernández, L. R., Gallastegui, G., Busquets, P. & Colombo, F. Geological setting of the Argentine Frontal Cordillera in the flat-slab segment (30°00′–31°30′S latitude). *J. South Am. Earth Sci.* **15**, 79–99 (2002).
40. Giambiagi, L. B. & Ramos, V. A. Structural evolution of the Andes in a transitional zone between flat and normal subduction (33 30′–33 45′ S), Argentina and Chile. *J. South Am. Earth Sci.* **15**, 101–116 (2002).
41. Giambiagi, L., Mescua, J., Bechis, F., Tassara, A. & Hoke, G. Thrust belts of the southern Central Andes: Along-strike variations in shortening, topography, crustal geometry, and denudation. *Geological Society of America Bulletin* **124**, 1339–1351 (2012).
42. Kley, J. & Monaldi, C. R. Tectonic inversion in the Santa Barbara System of the central Andean foreland thrust belt, northwestern Argentina. *Tectonics* **21**, 11–1–11–18 (2002).
43. Coutand, I. *et al.* Style and history of Andean deformation, Puna plateau, northwestern Argentina. *Tectonics* **20**, 210–234 (2001).
44. Kraemer, P. E. Structure of the Patagonian Andes: Regional Balanced Cross Section at 50° S, Argentina. *International Geology Review* **40**, 896–915 (1998).
45. Ghiglione, M. C. *et al.* Geodynamic context for the deposition of coarse-grained deep-water axial channel systems in the Patagonian Andes. *Basin Research* **26**, 726–745 (2014).
46. Fosdick, J. C. *et al.* Kinematic evolution of the Patagonian retroarc fold-and-thrust belt and Magallanes foreland basin, Chile and Argentina,

- 51 30'S. *Geological Society of America Bulletin* **123**, 1679–1698 (2011).
47. Betka, P. M. Structure of the Patagonian fold-thrust belt in the Magallanes region of Chile, 53° - 55° S Lat. (University of Texas at Austin, 2013).
48. Klepeis, K. *et al.* Continental underthrusting and obduction during the Cretaceous closure of the Rocas Verdes rift basin, Cordillera Darwin, Patagonian Andes. *Tectonics* **29**, n/a–n/a (2010).
49. Allmendinger, R. W. Tectonic development, southeastern border of the Puna Plateau, northwestern Argentine Andes. *Geological Society of America Bulletin* **97**, 1070 (1986).
50. Jordan, T. E. & Allmendinger, R. W. The Sierras Pampeanas of Argentina; a modern analogue of Rocky Mountain foreland deformation. *American Journal of Science* **286**, 737–764 (1986).
51. Coughlin, T. J., O'Sullivan, P. B., Kohn, B. P. & Holcombe, R. J. Apatite fission-track thermochronology of the Sierras Pampeanas, central western Argentina: Implications for the mechanism of plateau uplift in the Andes. *Geology* **26**, 999 (1998).
52. Torres-Carbonell, P. J., Olivero, E. B. & Dimieri, L. V. Control en la magnitud de desplazamiento de rumbo del Sistema Transformante Fagnano, Tierra del Fuego, Argentina. *Rev. geol. Chile* **35**, 63–77 (2008).
53. Kukowski, N. & Oncken, O. in *The Andes* 217–236 (Springer Berlin Heidelberg, 2006). doi:10.1007/978-3-540-48684-8\_10
54. Huene, von, R. & Ranero, C. R. Subduction erosion and basal friction along the sediment-starved convergent margin off Antofagasta, Chile. *J Geophys Res* **108**, (2003).
55. Scheuber, E., Bogdanic, T., Jensen, A. & Reutter, K.-J. in *Tectonics of the Southern Central Andes* 121–139 (Springer Berlin Heidelberg, 1994). doi:10.1007/978-3-642-77353-2\_9
56. Stern, C. R. Role of subduction erosion in the generation of Andean magmas. *Geology* **19**, 78 (1991).
